# Supplementary material
Source: HighWire-hosted journal article supplement (https://erj.ersjournals.com/content/55/2/1902385)
Supplement: inline-supplementary-material-1 [file inline-supplementary-material-1.pdf]

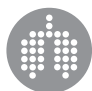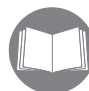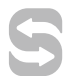

SHAREABLE PDF

# Floating the invisible swan: noninvasive prediction of haemodynamics

Vineet Agrawal and Evan L. Brittain

**Affiliation:** Division of Cardiology, Dept of Medicine, Vanderbilt University Medical Center, Nashville, TN, USA.

**Correspondence:** Evan L. Brittain, 2525 West End Ave, Ste 300-A, Nashville, TN 37203, USA.  
E-mail: [evan.brittain@vumc.org](mailto:evan.brittain@vumc.org)

 @ERSpublications

The study by Obokata and co-workers published in this issue of the *European Respiratory Journal* significantly contributes to the field of noninvasive prediction of haemodynamics during exercise <http://bit.ly/2svY7TP>

**Cite this article as:** Agrawal V, Brittain EL. Floating the invisible swan: noninvasive prediction of haemodynamics. *Eur Respir J* 2020; 55: 1902385 [<https://doi.org/10.1183/13993003.02385-2019>].

This single-page version can be shared freely online.

Pulmonary hypertension (PH) describes a heterogeneous set of diseases associated with increased morbidity and mortality, regardless of the aetiology [1–4]. The gold standard for diagnosing and phenotyping PH remains invasive measurement *via* right heart catheterisation [5]. Noninvasive estimation of pulmonary haemodynamics is an attractive alternative to reduce procedural risk and to more broadly study patient subsets who do not uniformly undergo right heart catheterisation for evaluation of PH (*e.g.* most patients with PH due to left heart disease) [5–7]. However, imperfect correlations between invasive and noninvasive measurements limit broad adoption of noninvasive strategies for the evaluation of PH [8–13].
